# Supplementary material for: Synthesis of 3-stannyl and 3-silyl propargyl phosphanes and the formation of a phosphinoallene
Source: Royal Society of Chemistry journal article supplement (doi:10.1039/c5dt03558a), 2015-11-04
Supplement: c5dt03558a1.pdf [file c5dt03558a1.pdf]

## Electronic Supporting Information

### Synthesis of 3-stannyl and 3-silyl propargyl phosphanes and the formation of a phosphinoallene

*Amy J. Saunders and Ian R. Crossley\**

|                                                                                 |    |
|---------------------------------------------------------------------------------|----|
| Figure S1. $^1\text{H}$ -NMR spectrum of compound <b>8</b> .                    | 2  |
| Figure S2. $^{13}\text{C}\{^1\text{H}\}$ -NMR spectrum of compound <b>8</b> .   | 3  |
| Figure S3. $^{119}\text{Sn}\{^1\text{H}\}$ -NMR spectrum of compound <b>8</b> . | 4  |
| Figure S4. $^1\text{H}$ -NMR spectrum of compound <b>15</b> .                   | 5  |
| Figure S5. $^{13}\text{P}\{^1\text{H}\}$ -NMR spectrum of compound <b>15</b> .  | 6  |
| Figure S6. $^{13}\text{C}\{^1\text{H}\}$ -NMR spectrum of compound <b>15</b> .  | 7  |
| Figure S7. $^1\text{H}$ -NMR spectrum of compound <b>16</b> .                   | 8  |
| Figure S8. $^{13}\text{P}\{^1\text{H}\}$ -NMR spectrum of compound <b>16</b> .  | 9  |
| Figure S9. $^{13}\text{C}\{^1\text{H}\}$ -NMR spectrum of compound <b>16</b> .  | 10 |

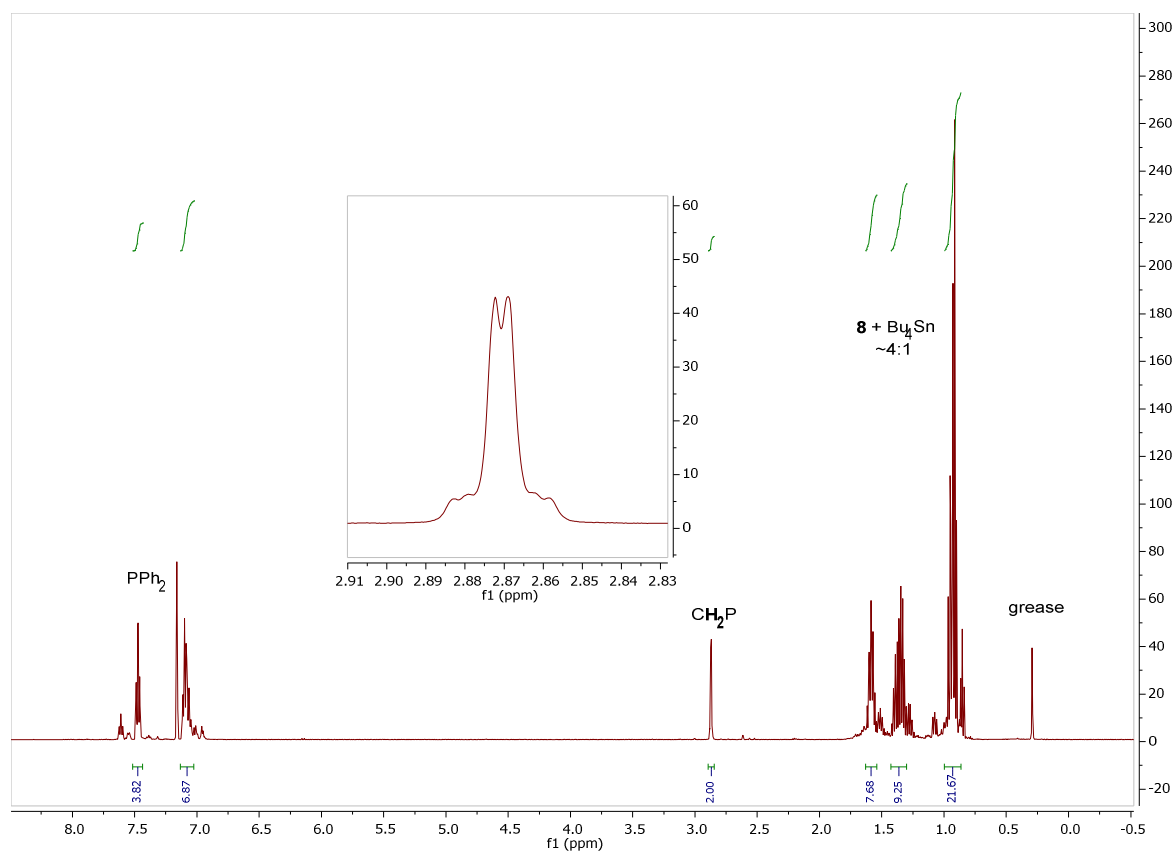

**Figure S1.**  $^1\text{H-NMR}$  spectrum of compound **8**. Key data:  $^1\text{H-NMR}$ :  $\delta_{\text{H}}$  0.93 (m,  $\text{CH}_3$ ), 1.36 (m, 12H, 2 x  $\text{CH}_2$ ), 1.58 (m, 6H,  $\text{CH}_2$ ), 2.87 (d,  $J_{\text{PH}}$  1.6 Hz,  $J_{117\text{SnC}}$  8.7 Hz,  $J_{119\text{SnC}}$  12.4 Hz, 2H,  $\text{CH}_2\text{P}$ ), 7.02 – 7.13 (m, 6H,  $m/p\text{-C}_6\text{H}_5$ ), 7.43 – 7.51 (m, 4H,  $o\text{-C}_6\text{H}_5$ ).

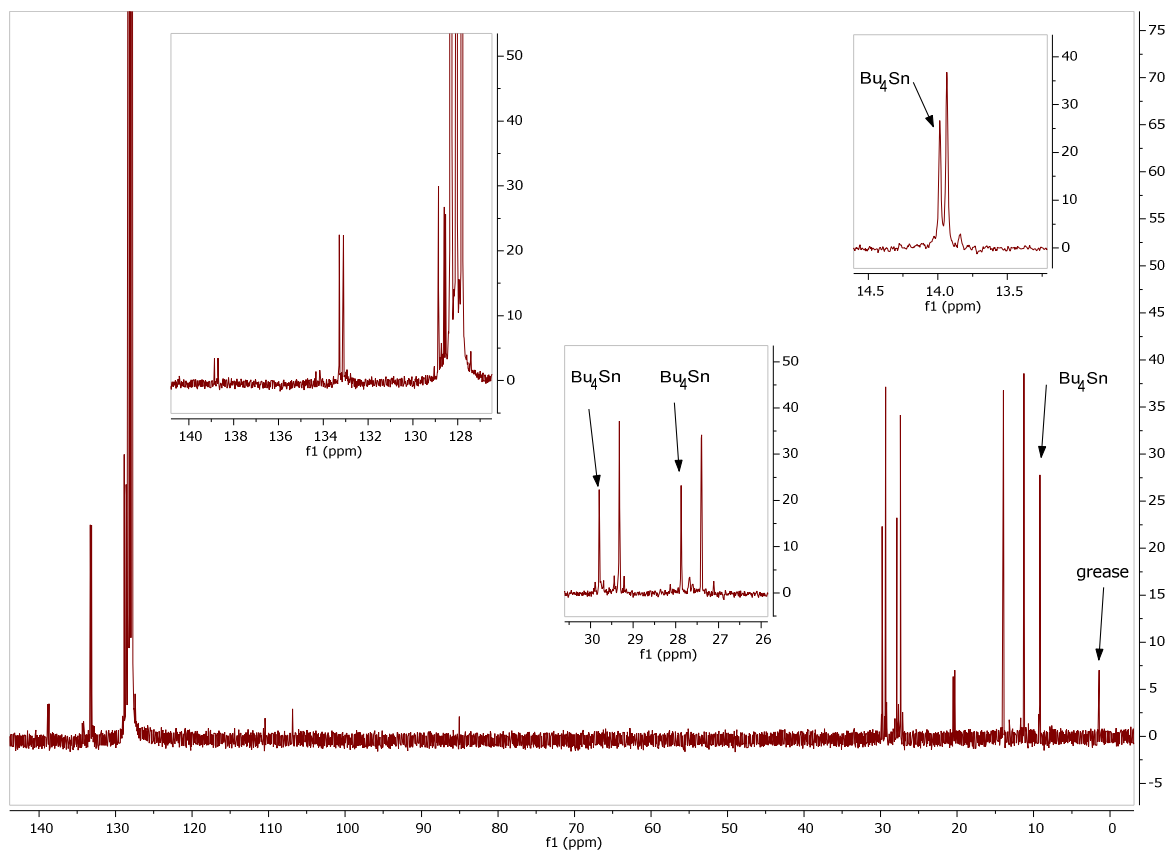

**Figure S2.**  $^{13}\text{C}\{^1\text{H}\}$ -NMR spectrum of compound **8**. Key data:  $^{13}\text{C}\{^1\text{H}\}$ -NMR:  $\delta_{\text{C}}$  11.3 (s,  $\underline{\text{C}}\text{H}_2\text{Sn}$ ,  $^1J_{^{117}\text{SnC}}$  366 Hz,  $^1J_{^{119}\text{SnC}}$  383 Hz), 13.9 (s,  $\underline{\text{C}}\text{H}_3$ ), 20.4 (d,  $^1J_{\text{PC}}$  18 Hz,  $\underline{\text{C}}\text{H}_2\text{PPh}_2$ ), 27.4 (s,  $\underline{\text{C}}\text{H}_2\text{CH}_2\text{Sn}$ ,  $J_{\text{SnC}}$  58 Hz), 85.0 (d,  $J_{\text{PC}}$  6 Hz,  $\underline{\text{C}}=\text{CCH}_2\text{PPh}_2$ ), 106.8 (d,  $J_{\text{PC}}$  5 Hz,  $\text{C}(\underline{\text{C}})\text{CH}_2\text{PPh}_2$ ), 128.6 (d,  $J_{\text{PC}}$  6 Hz, *m*- $\text{C}_6\text{H}_5$ ), 128.9 (s, *p*- $\text{C}_6\text{H}_5$ ), 133.2 (d,  $J_{\text{PC}}$  19 Hz, *o*- $\text{C}_6\text{H}_5$ ), 138.8 (d,  $J_{\text{PC}}$  17 Hz, *i*- $\text{C}_6\text{H}_5$ ).

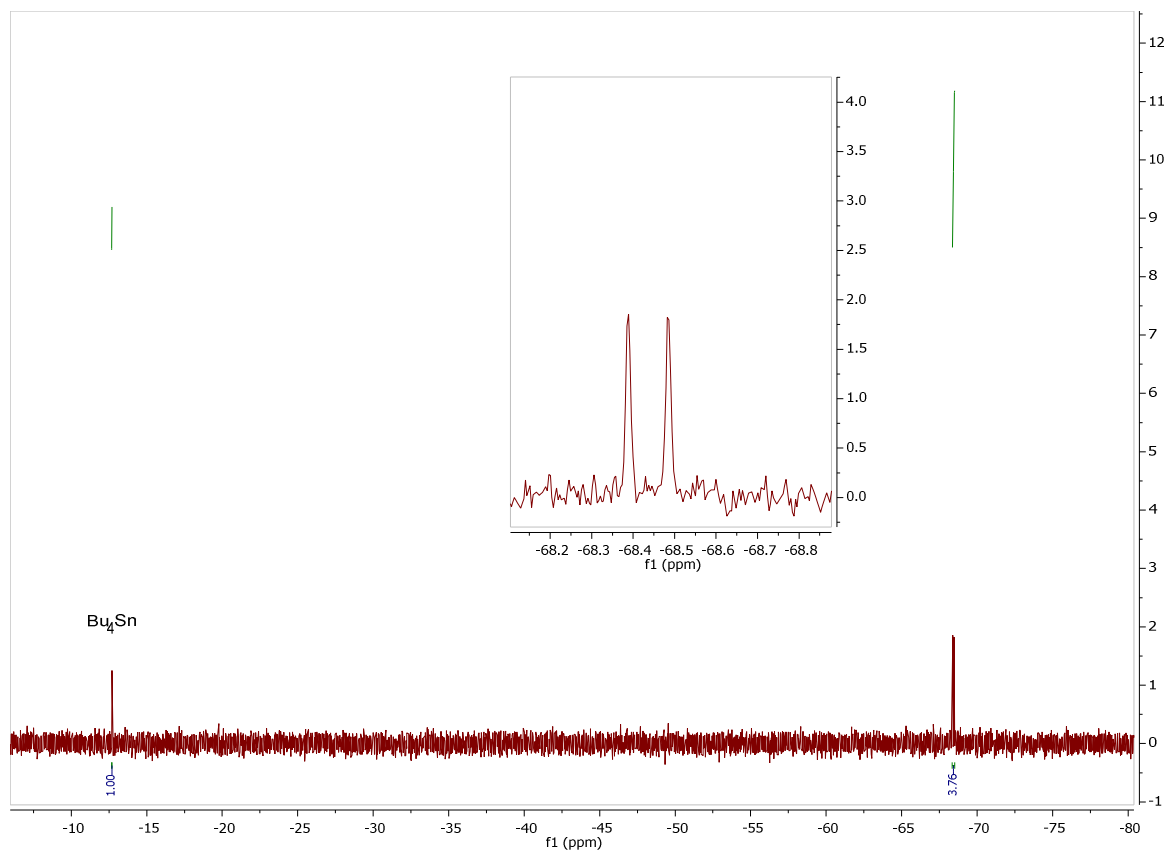

**Figure S3.**  $^{119}\text{Sn}\{^1\text{H}\}$ -NMR spectrum of compound **8**, illustrating relative proportions of **8** and  $\text{Bu}_4\text{Sn}$ .

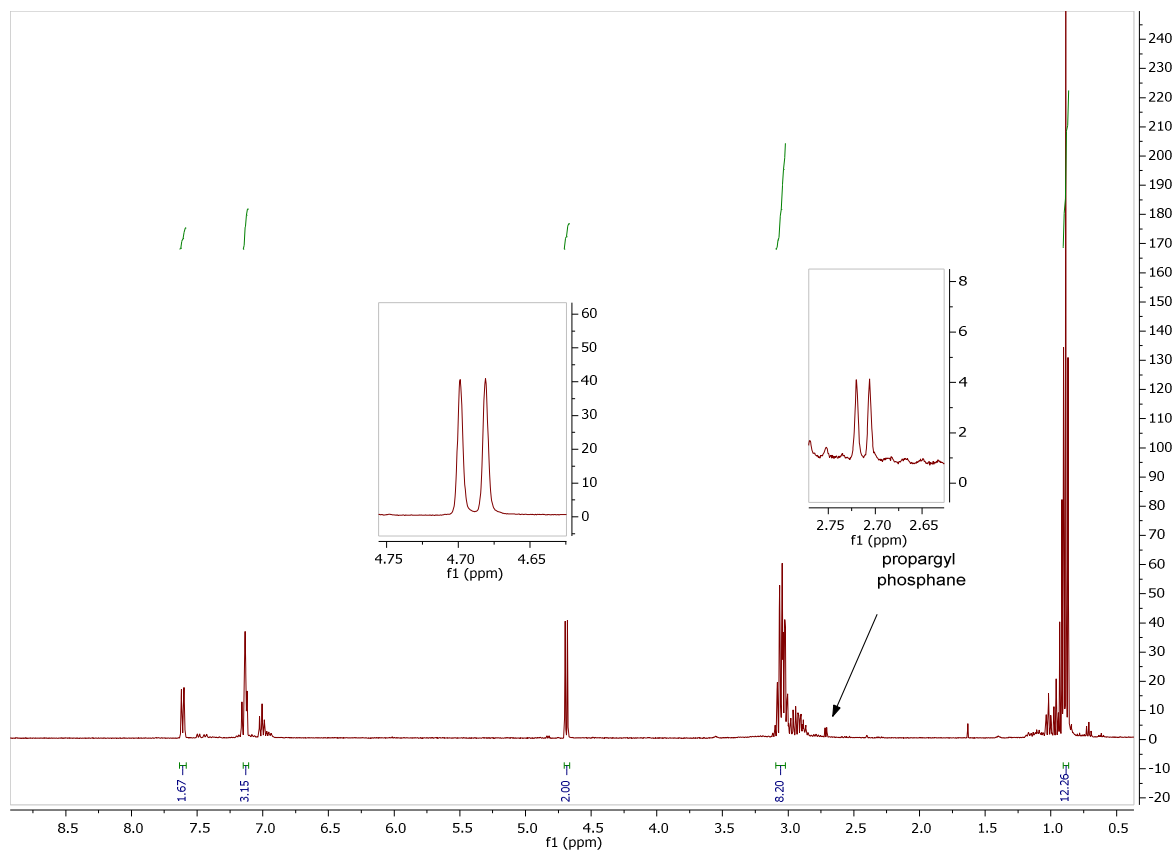

**Figure S4.**  $^1\text{H-NMR}$  spectrum of compound **15** (74 %) indicating assigned resonances and the presence of trace (ca 5 %) of the propargyl isomer. Key data:  $^1\text{H-NMR}$  (**15**):  $\delta_{\text{H}}$  0.89 (t,  $^3J_{\text{HH}}$  7.0 Hz, 12H,  $\text{CH}_3$ ), 3.05 (q,  $^3J_{\text{HH}}$  7.0 Hz, 8H,  $\text{CH}_2$ ), 4.69 (d,  $J_{\text{PH}}$  7.0 Hz, 2H,  $=\text{CH}_2$ ), 7.11 – 7.15 (m, 3H,  $m/p$ - $\text{C}_6\text{H}_5$ ), 7.63 – 7.59 (m, 2H,  $o$ - $\text{C}_6\text{H}_5$ ).  $^1\text{H-NMR}$  (propargyl):  $\delta_{\text{H}}$  1.02 (t,  $^3J_{\text{HH}}$  7.2 Hz, 12H,  $\text{CH}_3$ ), 2.71 (d,  $J_{\text{PH}}$  5.8 Hz, 2H,  $\text{CH}_2\text{P}$ ), 2.87 (m, 8H,  $\text{NCH}_2$ ).

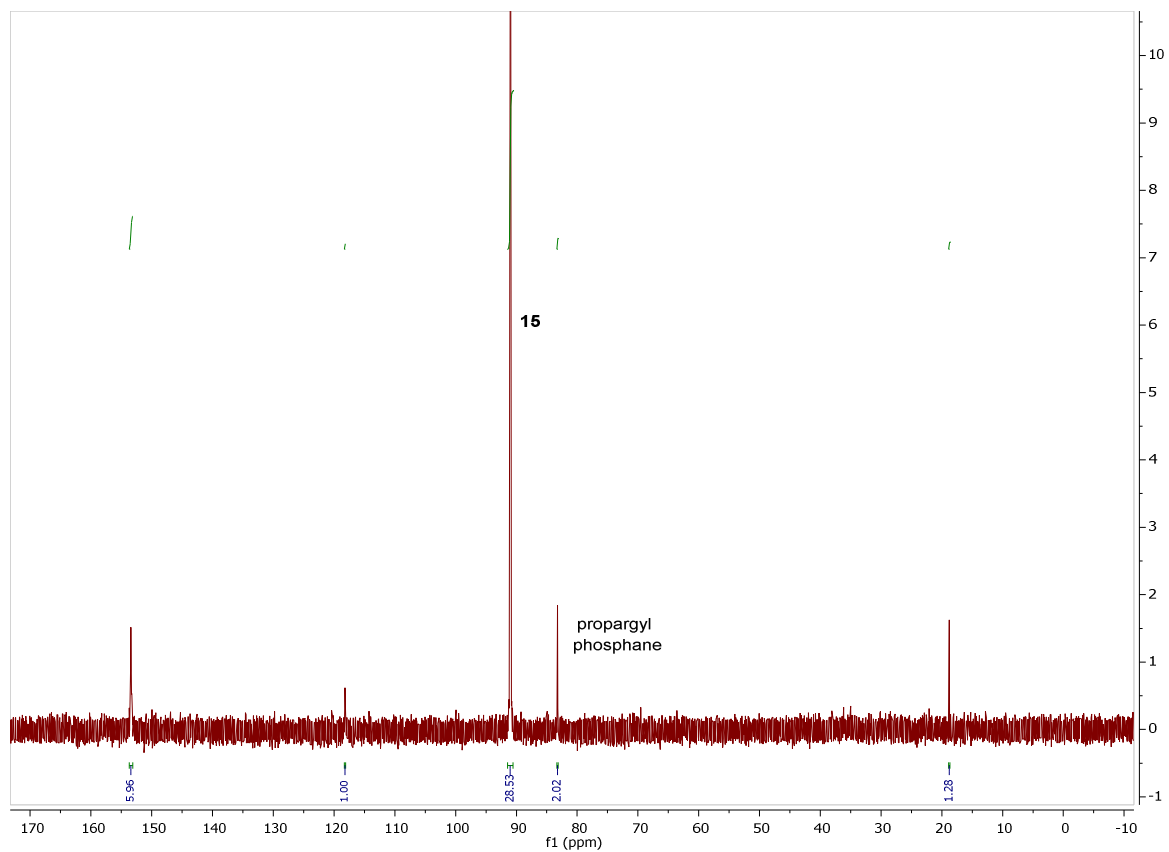

**Figure S5.**  $^{31}\text{P}\{^1\text{H}\}$  NMR spectrum of compound **15**, within product mixture also containing (inter alia) the propargyl phosphane  $(\text{Et}_2\text{N})_2\text{PCH}_2\text{C}\equiv\text{CPh}$ . Key data:  $^{31}\text{P}\{^1\text{H}\}$ -NMR:  $\delta_{\text{p}}$  91.0 (s, br, 74 %, **15**),  $^{31}\text{P}\{^1\text{H}\}$ -NMR:  $\delta_{\text{p}}$  83.2 (s, br, 5 %, propargyl).

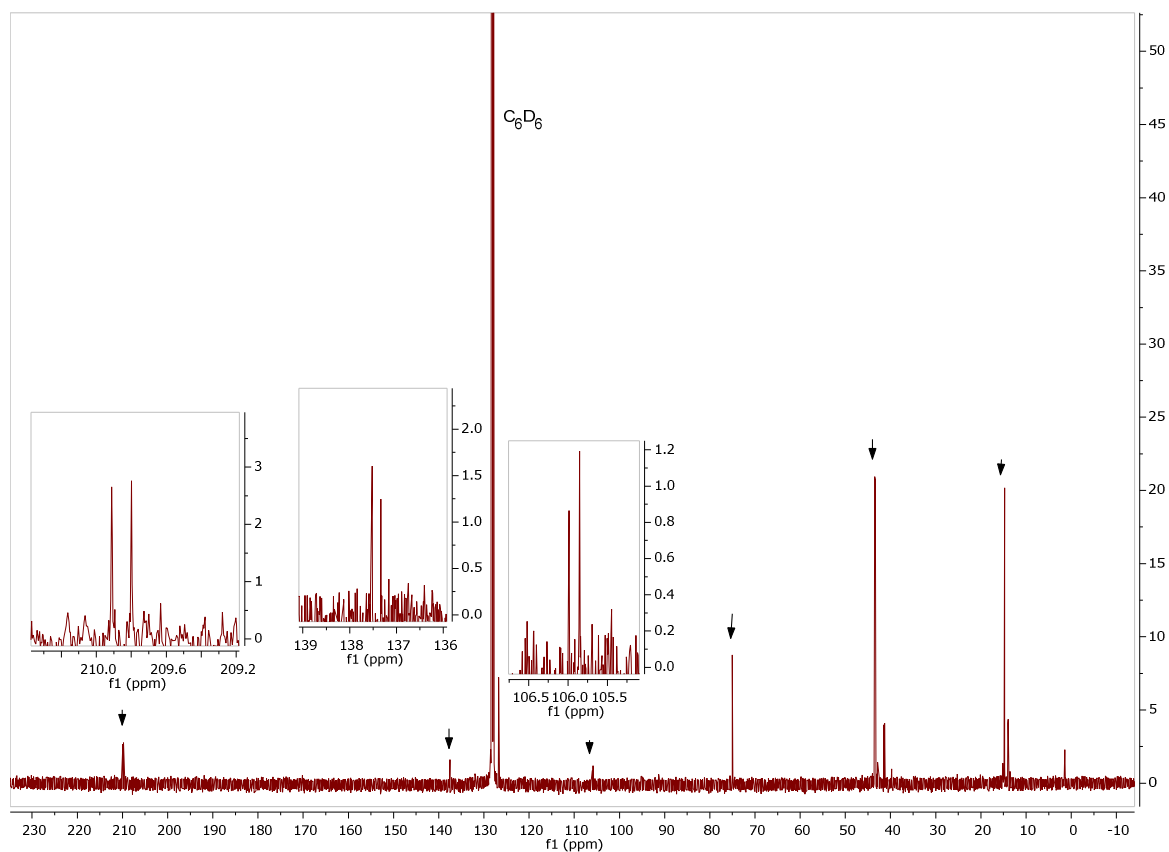

**Figure S6.**  $^{13}\text{C}\{^1\text{H}\}$ -NMR for compound **15**, illustrating key resonances within the mixture. Key data:  $^{13}\text{C}\{^1\text{H}\}$ -NMR:  $\delta_{\text{C}}$  14.8 (d,  $^3J_{\text{PC}}$  3.2 Hz,  $\underline{\text{C}}\text{H}_3$ ), 43.4 (d,  $^3J_{\text{PC}}$  17.4 Hz,  $\text{N}\underline{\text{C}}\text{H}_2$ ), 75.0 (s,  $=\underline{\text{C}}\text{H}_2$ ), 105.9 (d,  $J_{\text{PC}}$  13.5 Hz, *i*- $\text{C}_6\text{H}_5$ ), 137.4 (d,  $J_{\text{PC}}$  19 Hz,  $\text{Ph}\underline{\text{C}}\{\text{P}(\text{NEt}_2)_2\}\underline{\text{C}}$ ), 127.8 (s, *o*- $\text{C}_6\text{H}_5$ ), 127.9 (overlapped *m*-/*p*- $\text{C}_6\text{H}_5$ ), 209.9 (d,  $J_{\text{PC}}$  11.4 Hz,  $=\underline{\text{C}}=$ ).

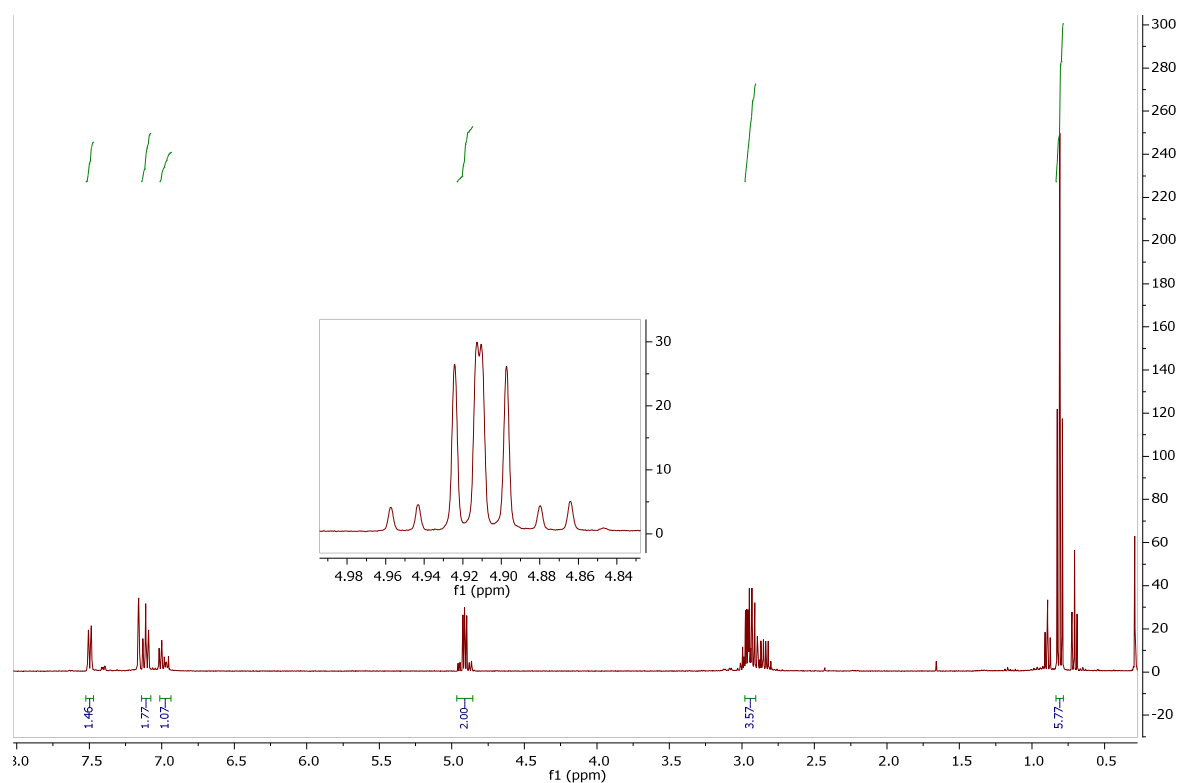

**Figure S7.**  $^1\text{H}$  NMR spectrum for compound **16** (77 %) in crude reaction mixture. Key data:  $^1\text{H}$ -NMR:  $\delta_{\text{H}}$  0.81 (t,  $^3J_{\text{HH}}$  6.9 Hz, 6H,  $\text{CH}_3$ ), 2.94 (q,  $^3J_{\text{HH}}$  7.4 Hz, 4H,  $\text{CH}_2$ ), 4.89 (dd,  $^2J_{\text{HH}}$  13.0 Hz,  $J_{\text{PH}}$  5.7 Hz, 1H,  $=\text{CH}_2$ ), 4.93 (dd,  $^2J_{\text{HH}}$  13.0 Hz,  $J_{\text{PH}}$  5.7 Hz, 1H,  $=\text{CH}_2$ ), 6.94 – 7.02 (m, 1H, *p*- $\text{C}_6\text{H}_5$ ), 7.11 (7,  $J_{\text{HH}}$  7.8 Hz, 2H, *m*- $\text{C}_6\text{H}_5$ ), 7.50 (d,  $J_{\text{HH}}$  7.8 Hz, 2H, *o*- $\text{C}_6\text{H}_5$ ).



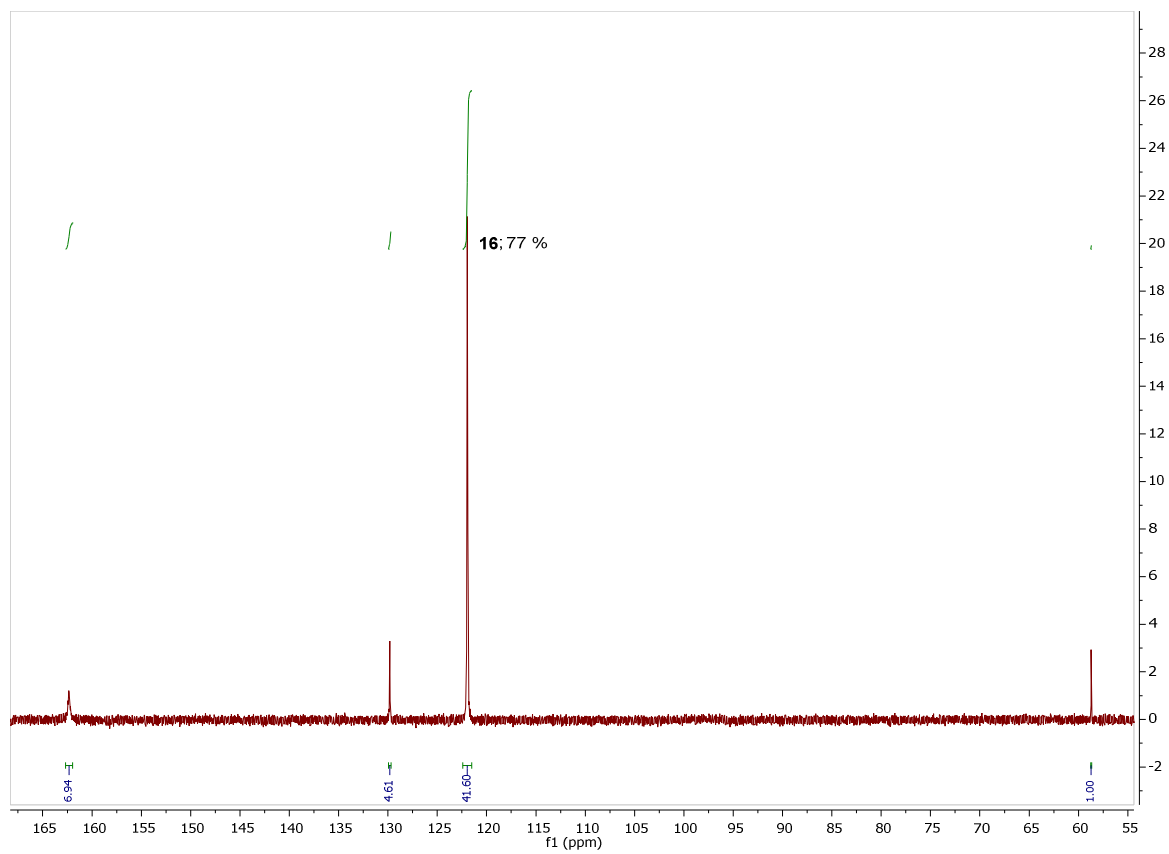

**Figure S8.**  $^{31}\text{P}\{^1\text{H}\}$ -NMR spectrum for compound **16** (77 %) in crude reaction mixture. Key data:  $^{31}\text{P}\{^1\text{H}\}$ -NMR:  $\delta_{\text{p}}$  122.0 (s, br, 77 %).

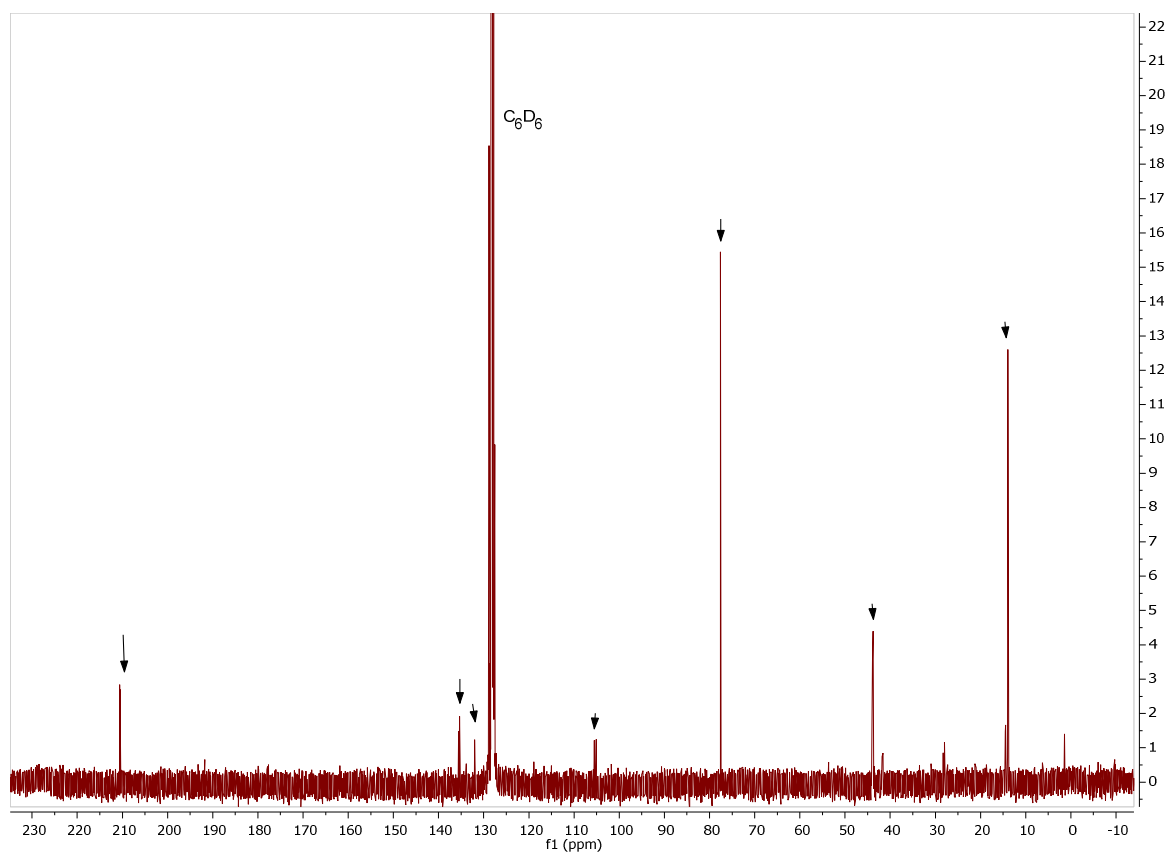

**Figure S9.**  $^{13}\text{C}\{^1\text{H}\}$ -NMR spectrum for compound **16**, illustrating the associated resonances within the mixture. Key data:  $^{13}\text{C}\{^1\text{H}\}$ -NMR:  $\delta_{\text{C}}$  13.9 (d,  $^3J_{\text{PC}}$  6.2 Hz,  $\text{CH}_3$ ), 43.9 (d,  $^3J_{\text{PC}}$  13 Hz,  $\text{NCH}_2$ ), 77.6 (s,  $=\text{CH}_2$ ), 105.3 (d,  $J_{\text{PC}}$  40 Hz,  $\text{PhC}\{\text{PCl}(\text{NEt}_2)\}_2\text{C}$ ), 135.4 (d,  $J_{\text{PC}}$  24 Hz, *i*- $\text{C}_6\text{H}_5$ ), 127.6 (d,  $J_{\text{PC}}$  1.5 Hz, *o*- $\text{C}_6\text{H}_5$ ), 127.98 (s, *p*- $\text{C}_6\text{H}_5$ ), 128.9 (s, *m*- $\text{C}_6\text{H}_5$ ), 210.6 (d,  $J_{\text{PC}}$  8.4 Hz,  $=\text{C}=\text{C}$ ).
